# Supplementary material for: Spontaneous bladder rupture and associated factors during pregnancy:a systematic review and metanalysis protocol
Source: HighWire-hosted journal article supplement (doi:10.1136/bmjopen-2022-063955), 2022-08-01
Supplement: bmjopen-2022-063955supp002_data_supplement.pdf [file bmjopen-2022-063955supp002_data_supplement.pdf]

## Search strategy

### PubMed

(("bladder rupture"[Title/Abstract] OR "spontaneous bladder rupture"[Title/Abstract] OR "SRUB"[Title/Abstract] OR "Urinary bladder rupture"[Title/Abstract] OR "rupture of the urinary bladder"[Title/Abstract] OR "ruptured urinary bladder"[Title/Abstract] OR "rapture of bladder"[Title/Abstract]) AND ("Pregnancy"[Title/Abstract] OR "Gestation"[Title/Abstract] OR "Pregnant Women"[Title/Abstract] OR "Birth"[Title/Abstract] OR "Childbirth"[Title/Abstract] OR "Parturition"[Title/Abstract] OR "Gravidity"[Title/Abstract] OR "Parity"[Title/Abstract]))

### Embase

(Pregnancy:ti,ab,kw OR Gestation:ti,ab,kw OR Pregnant Women:ti,ab,kw OR Birth:ti,ab,kw OR Childbirth:ti,ab,kw OR Parturition:ti,ab,kw OR Gravidity:ti,ab,kw OR Parity:ti,ab,kw) AND (bladder rupture:ti,ab,kw OR spontaneous bladder rupture:ti,ab,kw OR SRUB:ti,ab,kw OR Urinary bladder rupture:ti,ab,kw OR rupture of the urinary bladder:ti,ab,kw OR ruptured urinary bladder:ti,ab,kw OR rapture of bladder:ti,ab,kw)

### Scopus

(TITLE-ABS-KEY((Pregnancy) OR (Gestation) OR ("Pregnant Women") OR (Birth) OR (Childbirth) OR (Parturition) OR (Gravidity) OR (Parity))) AND (TITLE-ABS-KEY(("bladder rupture") OR ("spontaneous bladder rupture") OR (SRUB) OR ("Urinary bladder rupture") OR ("rupture of the urinary bladder") OR ("ruptured urinary bladder") OR ("rapture of bladder")))

### Web Of Science

(TS=((Pregnancy) OR (Gestation) OR ("Pregnant Women") OR (Birth) OR (Childbirth) OR (Parturition) OR (Gravidity) OR (Parity))) AND (TS=(("bladder rupture") OR ("spontaneous bladder rupture") OR (SRUB) OR ("Urinary bladder rupture") OR ("rupture of the urinary bladder") OR ("ruptured urinary bladder") OR ("rapture of bladder")))

### ProQuest

(ab((Pregnancy) OR (Gestation) OR ("Pregnant Women") OR (Birth) OR (Childbirth) OR (Parturition) OR (Gravidity) OR (Parity))) AND (ab(("bladder rupture") OR ("spontaneous bladder rupture") OR (SRUB) OR ("Urinary bladder rupture") OR ("rupture of the urinary bladder") OR ("ruptured urinary bladder") OR ("rapture of bladder")))

### Google Scholar

("Pregnancy" OR "Gestation" OR "Pregnant Women" OR "Birth" OR "Childbirth" OR "Parturition" OR "Gravidity" OR "Parity") AND ("bladder rupture" OR "spontaneous bladder rupture" OR "SRUB" OR "Urinary bladder rupture" OR "rupture of the urinary bladder" OR "ruptured urinary bladder" OR "rapture of bladder")

### **Cochrane library**

((("Pregnancy) OR (Gestation) OR ("Pregnant Women") OR (Birth) OR (Childbirth) OR (Parturition) OR (Gravidity) OR (Parity)) AND (("bladder rupture") OR ("spontaneous bladder rupture") OR (SRUB) OR ("Urinary bladder rupture") OR ("rupture of the urinary bladder") OR ("ruptured urinary bladder") OR ("rapture of bladder")))) in Title Abstract Keyword
